# Supplementary material
Source: publisher figshare collection journal article supplement (https://acs.figshare.com/ndownloader/files/13665926)
Supplement: Supplementary file 1 [file 13665926]

## Supplementary information

### A Surfactant-Free Direct Access to Porphyrin-Crosslinked Nanogels for Photodynamic and Photothermal Therapy

*Laura Chambre,<sup>a</sup> Wen Shang Saw,<sup>b</sup> Gülçin Ekineker,<sup>c</sup> Lik Voon Kiew,<sup>d</sup> Wu Yi Chong,<sup>e</sup> Hong  
Boon Lee,<sup>b</sup> Lip Yong Chung,<sup>b</sup> Yann Bretonnière,<sup>f</sup> Fabienne Dumoulin<sup>\*c</sup> and Amitav Sanyal<sup>\*a</sup>*

*<sup>a</sup> Department of Chemistry, Bogazici University, Bebek, 34342 Istanbul, Turkey.*

*<sup>b</sup> Department of Pharmacy, Faculty of Medicine, University of Malaya, 50603 Kuala Lumpur,  
Malaysia.*

*<sup>c</sup> Department of Chemistry, Gebze Technical University, Gebze, 41400 Kocaeli, Turkey.*

*<sup>d</sup> Department of Pharmacology, Faculty of Medicine, University of Malaya, 50603 Kuala Lumpur,  
Malaysia.*

*<sup>e</sup> Photonics Research Centre, Faculty of Science, University of Malaya, 50603 Kuala Lumpur,  
Malaysia*

*<sup>f</sup> Univ Lyon, ENS de Lyon, CNRS UMR 5182, Université Lyon I, Laboratoire de Chimie, F-69342 Lyon, France*

*Emails: fdumoulin@gtu.edu.tr and amitav.sanyal@boun.edu.tr*

## Contents

**Figure S1.**  $^1\text{H}$  NMR spectrum of copolymer poly(PEGMEMA-co-AHMA).

**Figure S2.** FTIR spectra of polymeric precursor poly(PEGMA-co-AHMA) & nanogel **NG-C**.

**Figure S3.** Dynamic light scattering measurement of **NG-A** after synthesis and 6 months upon storage.

**Figure S4.** UV-visible spectra of **NG-A**, **NG-B** and **NG-C** in ethanol and plots of the absorbance at 425, 570 and 607 nm vs concentration.

**Figure S5.** The effect of 450 nm laser irradiation on MDA-MB-231, MCF7 and AsPC-1 cell viability.

**Figure S6.** The effect of 635 nm laser irradiation on MDA-MB-231, MCF7 and AsPC-1 cell viability.

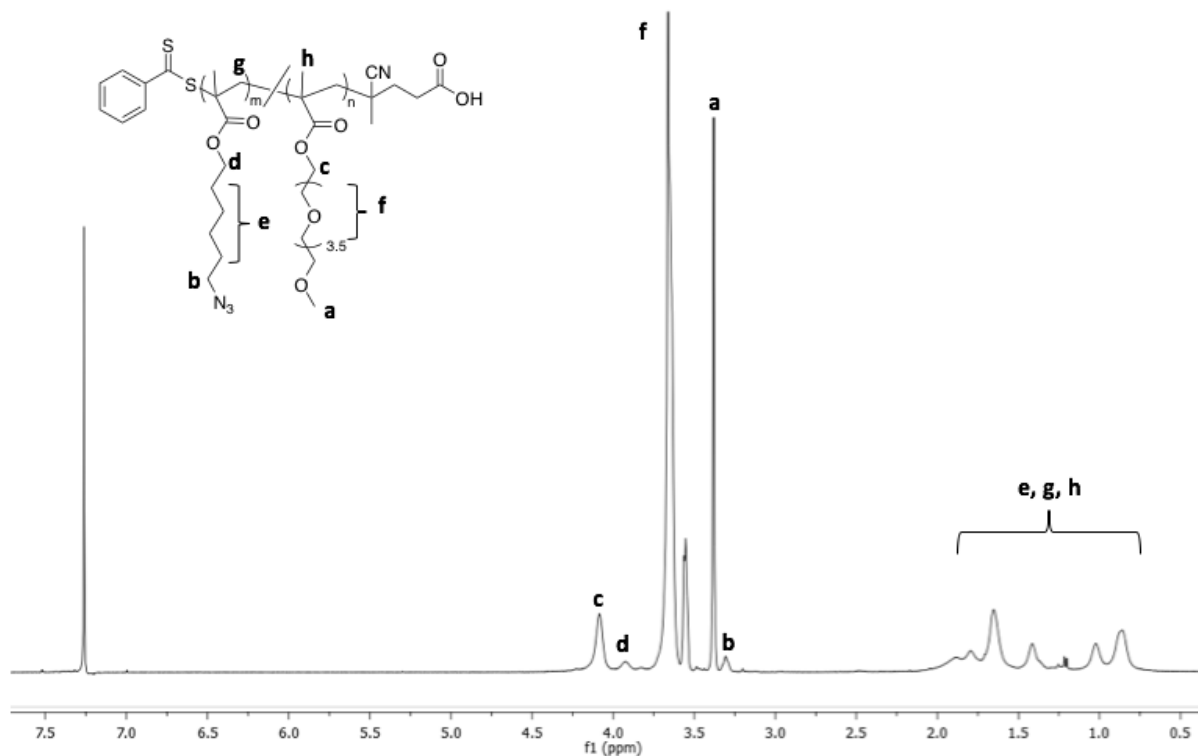

**Figure S1.**  $^1\text{H}$  NMR spectrum of copolymer poly(PEGMEMA-co-AHMA).

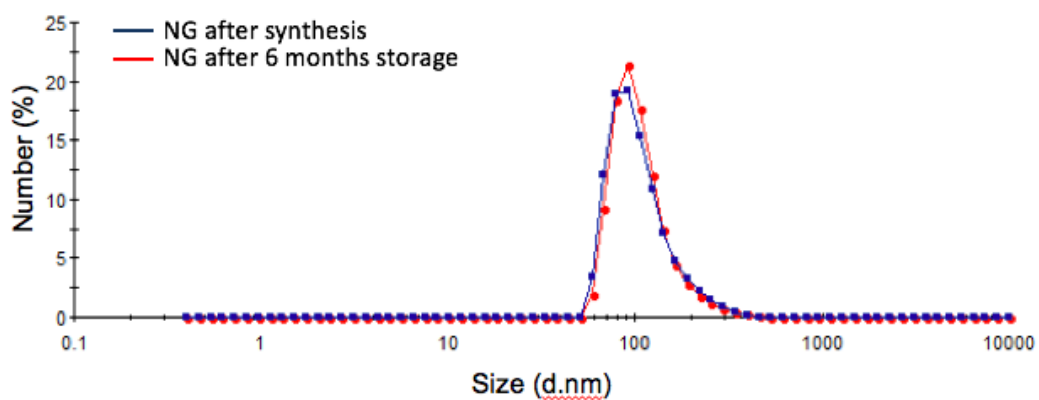

**Figure S2.** Dynamic light scattering measurement of **NG-A** after synthesis and 6 months upon storage.

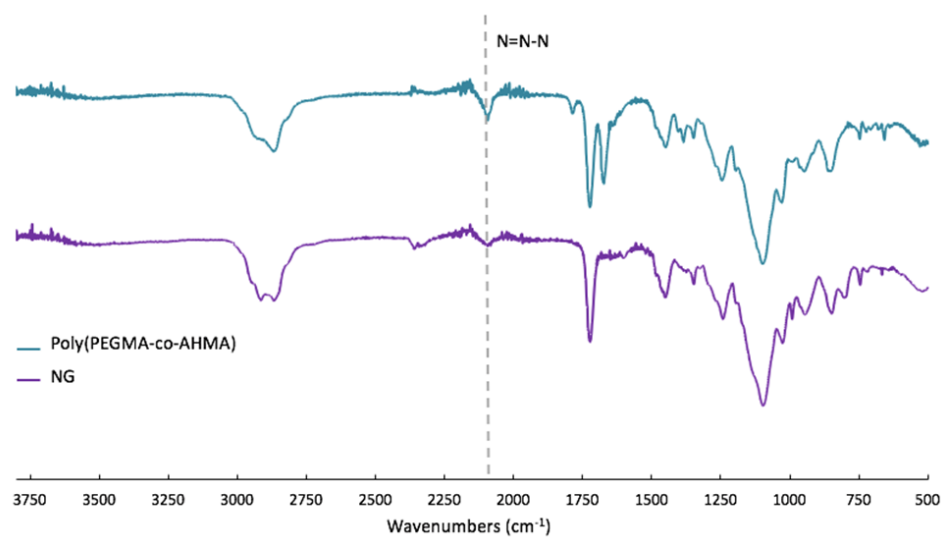

**Figure S3.** FTIR spectra of polymeric precursor poly(PEGMA-co-AHMA) & nanogel **NG-C**.

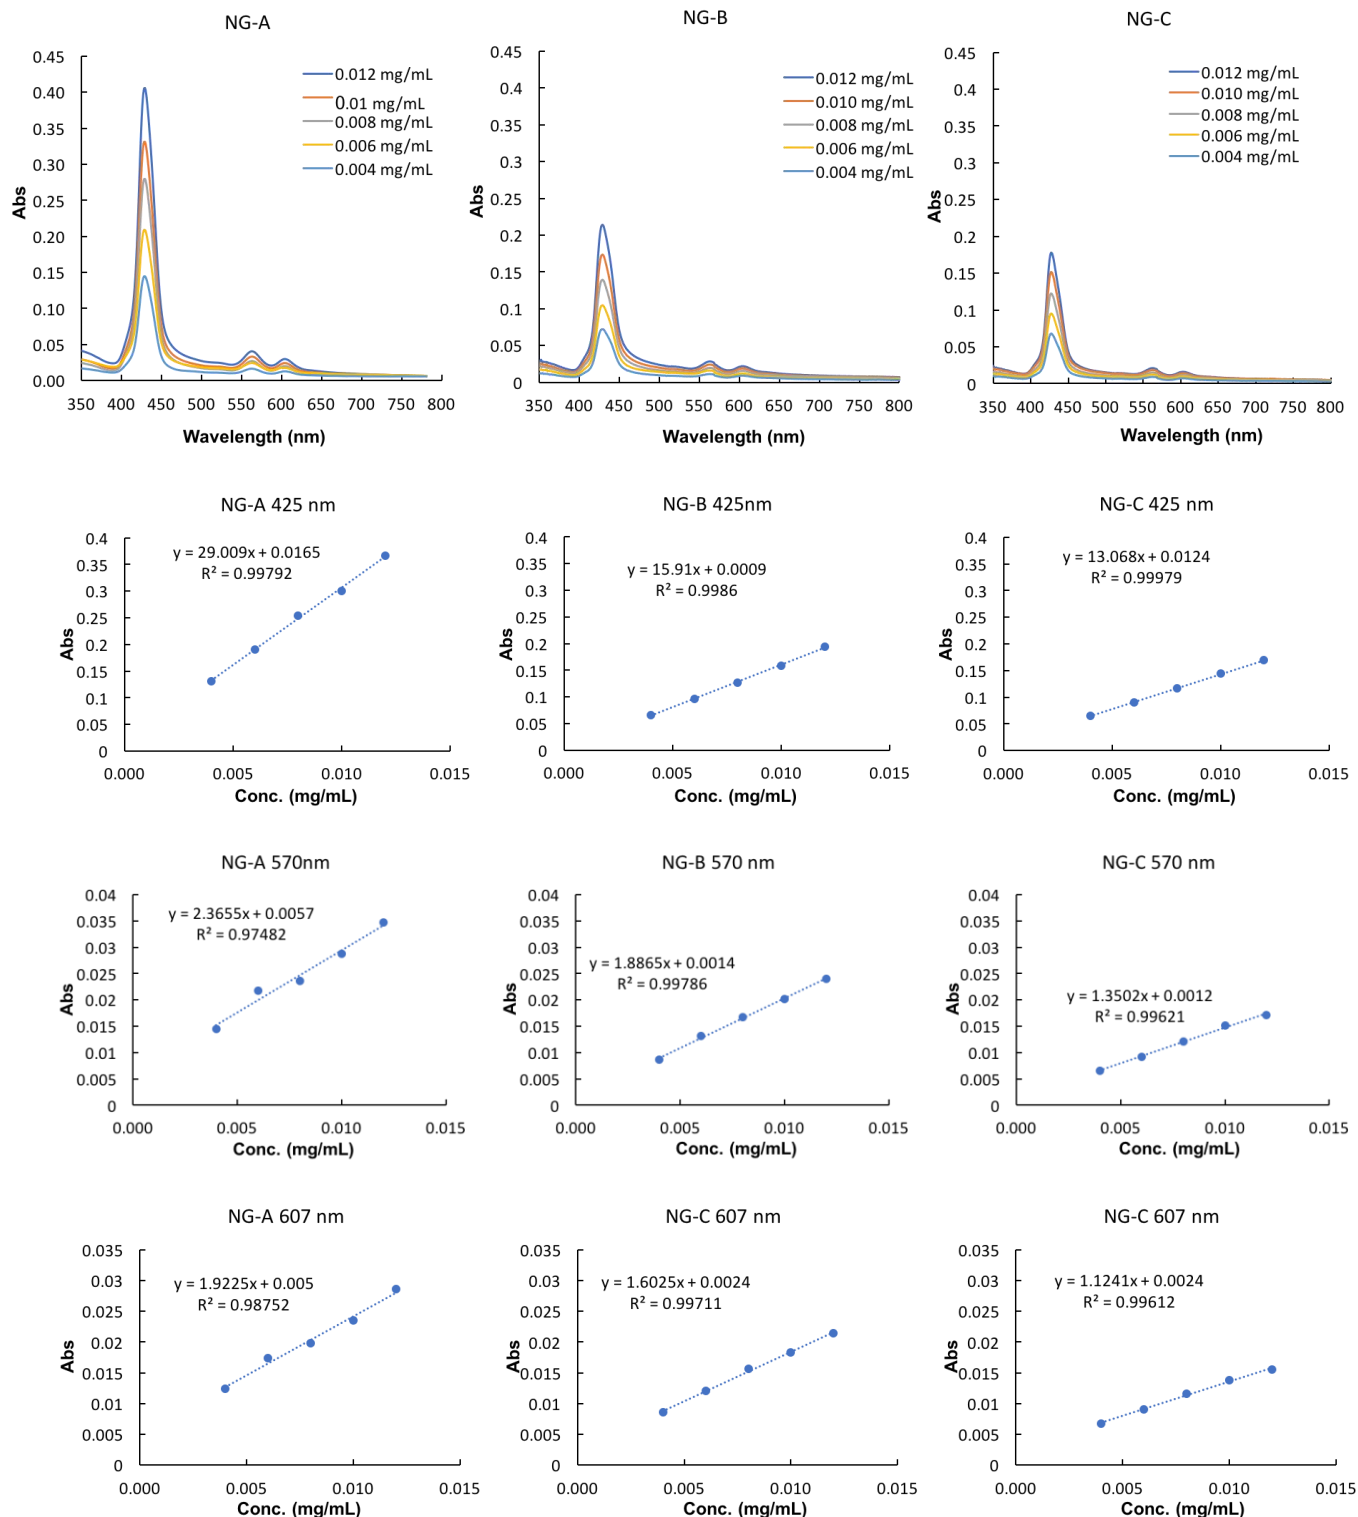

**Figure S4.** UV-visible spectra of NG-A, NG-B and NG-C in ethanol and plots of the absorbance at 425, 570 and 607 nm vs concentration.

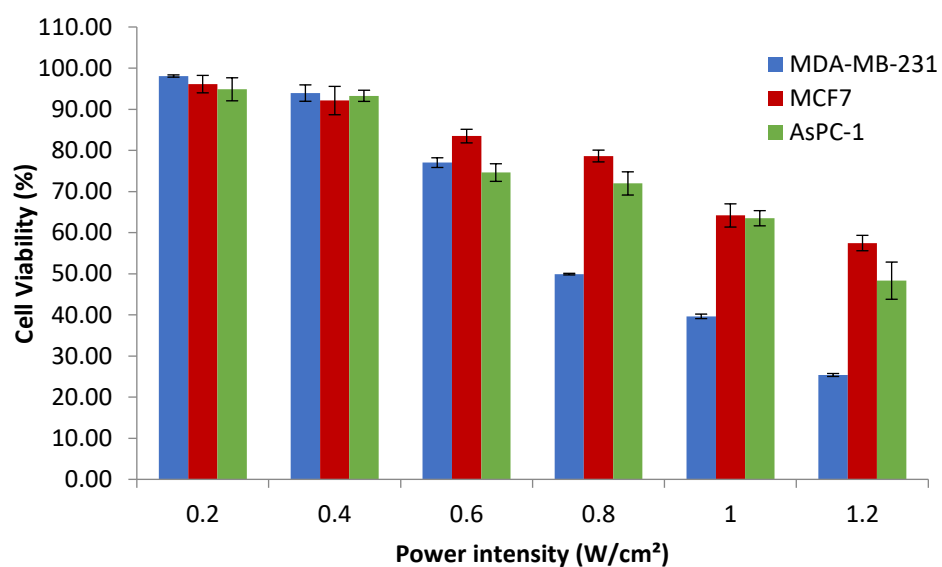

**Figure S5.** The effect of 450 nm laser irradiation on MDA-MB-231, MCF7 and AsPC-1 cell viability.

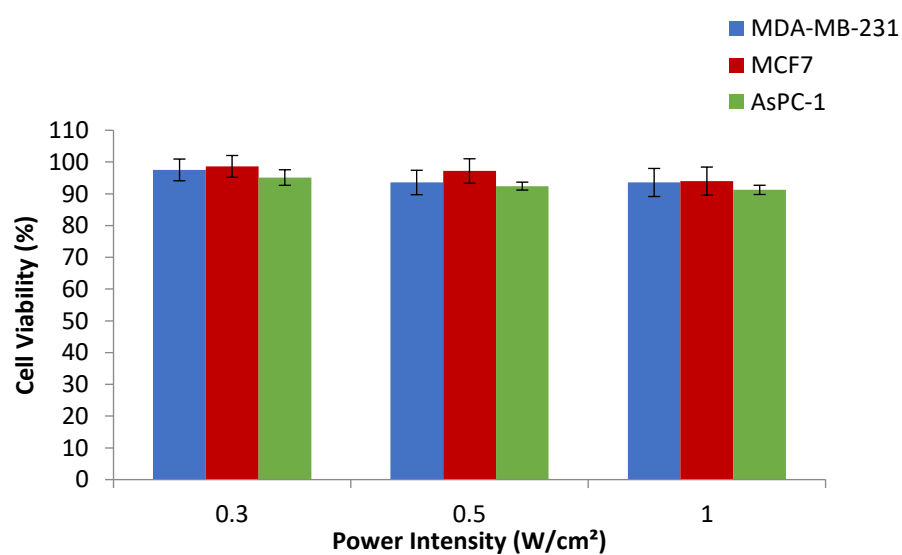

**Figure S6.** The effect of 635 nm laser irradiation on MDA-MB-231, MCF7 and AsPC-1 cell viability.
